# Supplementary material for: The importance of marshes providing soil stabilization to resist fast‐flow erosion in case of a dike breach
Source: PubMed Central journal article supplement (PMC9541637; doi:10.1002/eap.2622), 2022-05-17

**Supporting information.** Marin-Diaz, B., L. L. Govers, D. van der Wal, H. Olf, and T. J. Bouma. The importance of marshes providing soil stabilization to resist fast-flow erosion in case of a dike breach. *Ecological Applications*.

## **Appendix S1**

|                                                                                                                      |    |
|----------------------------------------------------------------------------------------------------------------------|----|
| <b>Eq. S1.</b> Calculation bottom shear stress and flow velocity .....                                               | 2  |
| <b>Table S1.</b> Sites and properties of the sampling locations .....                                                | 3  |
| <b>Table S2.</b> Grain size samples.....                                                                             | 5  |
| <b>Fig. S1.</b> Images from field sampling.....                                                                      | 7  |
| <b>Fig. S2.</b> Custom-made wooden boxes with soil sample.....                                                       | 8  |
| <b>Fig. S3.</b> Mean erosion depth for a prolonged time period (16h) in samples with artificial cracks.....          | 9  |
| <b>Fig. S4.</b> Mean erosion depth (cm) at the end of the experiment after 3 h of flow exposure.....                 | 10 |
| <b>Fig. S5.</b> Spearman correlation matrix from the environmental variables.....                                    | 11 |
| <b>Fig. S6.</b> Example of the erosion from sandy tidal flat vs sandy marsh with cohesive top-layer.....             | 12 |
| <b>Fig. S7.</b> Examples of erosion profiles .....                                                                   | 13 |
| <b>Fig. S8.</b> Example of the erosion in form of blocks in samples with natural cracks due to a summer drought..... | 14 |
| <b>Fig. S9.</b> Deep soil profiles (1.5m).....                                                                       | 15 |

**Eq. S1.** Calculation of the bottom shear stress and flow velocity applied to the samples during the erosion tests. It should be taken into account that the uncertainty in the bed roughness is not possible to measure and that we are dealing with a supercritical sheet flow, for which shear stress calculations may not be strictly valid. Therefore with this calculation we aimed to provide an indication of the shear stress.

Shear stress ( $\text{N m}^{-2}$ ) was calculated as

$$\tau_b = \rho g \left( \frac{u^2}{C^2} \right)$$

Where  $\rho$  is water density ( $1025 \text{ kg m}^{-3}$ ),  $g$  is gravitational acceleration ( $9.81 \text{ m s}^{-2}$ ),  $u$  is flow velocity and  $C$  is the Chézy coefficient ( $\text{m}^{0.5} \text{ s}^{-1}$ ).

Flow velocity was calculated as

$$u = \frac{d}{h_2}$$

Where  $d$  is the discharge, calculated as

$$d = h_0 h_2 \left( \frac{2g}{h_2 + h_0} \right)^{0.5}$$

Where  $h_0$  is the water depth of the basin (0.3 m), and  $h_2$  is the minimum water depth behind the gate (i.e., where velocity is highest), calculated as

$$h_2 = \frac{h_1}{contract}$$

$h_1$  is the opening height (0.024 m) and *contract* is the contraction constant (0.6).

The Chézy roughness coefficient, which can be approximated for hydraulic rough flow as (van Rijn, 2019), was calculated as

$$C = 18 \log_{10} \left( \frac{12 h_2}{k_s} \right)$$

Where  $k_s$  is bed roughness (0.0005 m).

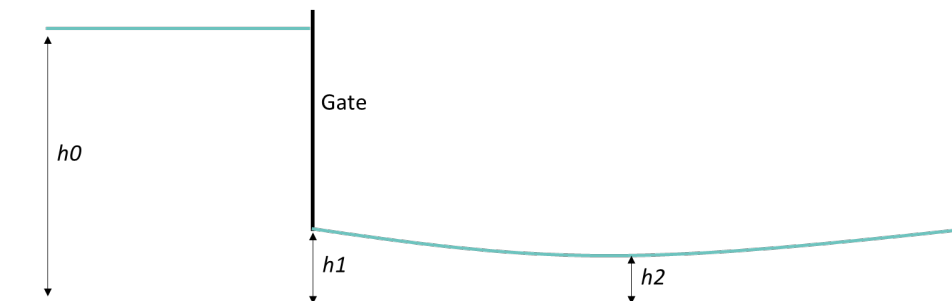

Reference:

van Rijn, L. C. (2019). Erodibility of Mud–Sand Bed Mixtures. *Journal of Hydraulic Engineering*, 146(1), 04019050. [https://doi.org/10.1061/\(asce\)hy.1943-7900.0001677](https://doi.org/10.1061/(asce)hy.1943-7900.0001677)

**Table S1.** Sites and properties of the sampling locations. Dollard Bay, Holwerd, Schiermonnikoog, Griend, Uithuizen and Zwarte Haan belong to the Dutch Wadden Sea area. Paulina, Rilland, Ritthem, Waarde and Zuidgors belong to the Westerschelde area in the South of the Netherlands.

|                        | Code sample | Habitat type            | Elevation (NAP) | Dominant vegetation | Large grazers | Orchestia presence | Cohesive layer depth core (cm) | Top layer from stable samples |
|------------------------|-------------|-------------------------|-----------------|---------------------|---------------|--------------------|--------------------------------|-------------------------------|
| <b>Dollard Bay</b>     | do1         | Silty established marsh | 1.931           | Festuca             | cows          | 0                  | 20                             | cohesive                      |
|                        | do2         | Silty established marsh | 1.898           | Puccinellia         | cows          | 0                  | 20                             | cohesive                      |
|                        | do3         | Silty established marsh | 1.99            | Phragmites          | cows          | 1                  | 20                             | cohesive                      |
|                        | do4         | Silty pioneer marsh     | 1.396           | Phragmites          | ungrazed      | 1                  | 20                             | cohesive                      |
|                        | do5         | Silty tidal flat        | 0.986           | \                   | ungrazed      | 0                  | 20                             | \                             |
| <b>Holwerd</b>         | ho1         | Silty established marsh | 1.546           | Phragmites          | ungrazed      | 1                  | 20                             | cohesive                      |
|                        | ho2         | Silty established marsh | 1.638           | Atriplex prostrata  | ungrazed      | 1                  | 20                             | cracks                        |
|                        | ho3         | Silty established marsh | 1.571           | Atriplex prostrata  | ungrazed      | 1                  | 20                             | cohesive                      |
|                        | ho4         | Silty pioneer marsh     | 1.149           | Spartina            | ungrazed      | 1                  | 20                             | pioneer (mud)                 |
|                        | ho5         | Silty pioneer marsh     | 1.141           | Salicornia          | ungrazed      | 0                  | 20                             | pioneer (mud)                 |
| <b>Paulina</b>         | pau1        | Silty established marsh | 2.413           | Elytrigia atherica  | ungrazed      | 0                  | 20                             | cracks                        |
|                        | pau2        | Silty established marsh | 2.398           | Elytrigia atherica  | ungrazed      | 1                  | 20                             | cracks                        |
|                        | pau3        | Silty established marsh | 2.338           | A. portulacoides    | ungrazed      | 0                  | 20                             | cohesive                      |
|                        | pau4        | Silty pioneer marsh     | 1.282           | Spartina            | ungrazed      | 0                  | 20                             | cohesive                      |
|                        | pau5        | Silty tidal flat        | 0.626           | \                   | ungrazed      | 0                  | 20                             | \                             |
| <b>Rilland</b>         | ri1         | Silty established marsh | 3.406           | Elytrigia atherica  | ungrazed      | 0                  | 20                             | detritus/lose                 |
|                        | ri2         | Silty established marsh | 3.004           | Phragmites          | ungrazed      | 0                  | 20                             | pioneer (mud)                 |
|                        | ri3         | Silty established marsh | 3.042           | Scirpus             | ungrazed      | 1                  | 20                             | pioneer (mud)                 |
|                        | ri4         | Sandy pioneer marsh     | 2.738           | Scirpus             | ungrazed      | 1                  | 0                              | \                             |
|                        | ri5         | Sandy tidal flat        | 2.494           | \                   | ungrazed      | 1                  | 0                              | \                             |
|                        | ri6         | Sandy tidal flat        | 2.304           | \                   | ungrazed      | 1                  | 0                              | \                             |
| <b>Ritt-<br/>hem</b>   | rit1        | Sandy pioneer marsh     | 2.019           | Spartina            | ungrazed      | 0                  | 0                              | \                             |
|                        | rit2        | Sandy pioneer marsh     | 1.933           | Spartina            | ungrazed      | 0                  | 0                              | \                             |
| <b>Schiermonnikoog</b> | sch1        | Sandy established marsh | 2.222           | Elytrigia atherica  | ungrazed      | 1                  | 0                              | cohesive                      |
|                        | sch10       | Sandy established marsh | 1.342           | Aster               | ungrazed      | 1                  | 5                              | cohesive                      |
|                        | sch11       | Sandy pioneer marsh     | 0.988           | Salicornia          | ungrazed      | 0                  | 0                              | \                             |
|                        | sch12       | Sandy tidal flat        | 0.857           | \                   | ungrazed      | 0                  | 0                              | \                             |
|                        | sch2        | Sandy established marsh | 1.801           | Juncus maritimus    | sheep         | 1                  | 14.5                           | cohesive                      |
|                        | sch3        | Sandy established marsh | 1.834           | Juncus maritimus    | sheep         | 1                  | 16                             | cohesive                      |
|                        | sch4        | Sandy established marsh | 1.866           | Juncus gerardi      | sheep         | 0                  | 12.5                           | cohesive                      |
|                        | sch5        | Sandy established marsh | 1.521           | Juncus maritimus    | ungrazed      | 1                  | 2                              | cohesive                      |
|                        | sch6        | Sandy established marsh | 1.147           | Suaeda,Puccinellia  | ungrazed      | 1                  | 5                              | \                             |
|                        | sch7        | Sandy pioneer marsh     | 1.129           | Spartina            | ungrazed      | 0                  | 0                              | \                             |
|                        | sch8        | Sandy established marsh | 1.697           | Elytrigia           | ungrazed      | 1                  | 10.5                           | cohesive                      |
|                        | sch9        | Sandy established marsh | 1.591           | Juncus              | ungrazed      | 1                  | 6                              | \                             |

|                    |      |                         |       |                    |          |   |     |               |
|--------------------|------|-------------------------|-------|--------------------|----------|---|-----|---------------|
| <b>Uithuizen</b>   | uit1 | Silty established marsh | 3.544 | Festuca            | sheep    | 0 | 20  | cohesive      |
|                    | uit2 | Silty established marsh | 3.587 | Elytrigia atherica | sheep    | 0 | 20  | cohesive      |
|                    | uit3 | Silty established marsh | 3.322 | Salicornia         | sheep    | 0 | 20  | cohesive      |
|                    | uit4 | Silty pioneer marsh     | 3.236 | Salicornia         | ungrazed | 0 | 20  | cohesive      |
|                    | uit5 | Silty tidal flat        | 3.143 | \                  | ungrazed | 0 | 20  | \             |
| <b>Waarde</b>      | waa1 | Silty established marsh | 2.853 | Limonium           | ungrazed | 1 | 20  | cohesive      |
|                    | waa2 | Silty established marsh | 2.891 | Elytrigia atherica | ungrazed | 1 | 20  | detritus/lose |
|                    | waa3 | Silty established marsh | 2.848 | Scirpus            | ungrazed | 1 | 20  | cohesive      |
|                    | waa4 | Silty established marsh | 2.983 | Elytrigia atherica | ungrazed | 1 | 20  | cohesive      |
|                    | waa5 | Silty tidal flat        | 1.701 | \                  | ungrazed | 0 | 20  | \             |
|                    | waa6 | Silty tidal flat        | 1.657 | \                  | ungrazed | 0 | 20  | \             |
| <b>Zuidgors</b>    | zui1 | Silty established marsh | 2.374 | Atriplex           | ungrazed | 1 | 20  | cohesive      |
|                    | zui2 | Silty established marsh | 2.602 | Elytrigia atherica | ungrazed | 1 | 20  | cohesive      |
|                    | zui3 | Silty established marsh | 2.441 | Aster              | ungrazed | 0 | 20  | cohesive      |
|                    | zui4 | Silty pioneer marsh     | 2     | Spartina           | ungrazed | 0 | 20  | pioneer (mud) |
|                    | zui5 | Silty tidal flat        | 1.742 | \                  | ungrazed | 0 | 20  | \             |
| <b>Zwarte Haan</b> | zwa1 | Silty established marsh | 2.199 | Festuca            | cows     | 0 | 20  | cohesive      |
|                    | zwa2 | Silty established marsh | 1.925 | Festuca            | cows     | 0 | 20  | cohesive      |
|                    | zwa3 | Silty established marsh | 1.49  | Suaeda             | cows     | 1 | 20  | cracks        |
|                    | zwa4 | Silty pioneer marsh     | 1.132 | Spartina           | ungrazed | 0 | 20  | pioneer (mud) |
|                    | zwa5 | Silty pioneer marsh     | 1.145 | \                  | ungrazed | 0 | 20  | \             |
| <b>Griend</b>      | gri1 | Silty established marsh | 1.381 | Elytrigia          | ungrazed | 1 | 5.5 | cohesive      |
|                    | gri2 | Silty established marsh | 1.041 | Atriplex           | ungrazed | 1 | 5   | cohesive      |
|                    | gri3 | Silty established marsh | 1.263 | Aster              | ungrazed | 1 | 2.5 | cohesive      |
|                    | gri4 | Sandy tidal flat        | 1.096 | \                  | ungrazed | 0 | 0   | \             |

**Table S2.** Grain sizes from the top layer of the samples (0-5cm depth) determined with Malvern® Mastersizer 2000. SD50MUM\_2 = Median grainsize D50 in  $\mu\text{m}$ , SD50PHIM\_2 = Median grainsize D50 in PHI, SMODE\_2 = Modus grainsize in  $\mu\text{m}$ , SCOARSE%\_2 = Coarse sand fraction PHI 0-1, 500-1000  $\mu\text{m}$ , SMEDIUM%\_2 = Medium sand fraction PHI 1-2, 250-500  $\mu\text{m}$ , SFINES%\_2 = Fine sand fraction PHI 2-3, 125-250  $\mu\text{m}$ , SVFINES%\_2 = Very Fine sand fraction PHI 3–4, 62.5-125  $\mu\text{m}$ , SSILT63\_2 = Silt fraction < 63  $\mu\text{m}$

| Code  | SD50MUM_2 ( $\mu\text{m}$ ) | SD50PHIM_2 (phi) | SMODE_2 ( $\mu\text{m}$ ) | SCOARSE%_2 (%) | SMEDIUM%_2 (%) | SFINES%_2 (%) | SVFINES%_2 (%) | SSILT63_2 (%) |
|-------|-----------------------------|------------------|---------------------------|----------------|----------------|---------------|----------------|---------------|
| ri1   | 29.2                        | 5.1              | 47.1                      | 1.0            | 2.4            | 6.3           | 16.6           | 73.9          |
| ri2   | 27.4                        | 5.2              | 33.7                      | 2.8            | 4.7            | 6.2           | 12.3           | 74.2          |
| ri3   | 30.0                        | 5.1              | 44.8                      | 0.4            | 0.9            | 4.0           | 18.0           | 77.0          |
| ri4   | 104.8                       | 3.3              | 108.2                     | 0.0            | 0.1            | 30.5          | 59.0           | 10.7          |
| ri5   | 102.6                       | 3.3              | 107.3                     | 0.0            | 0.2            | 30.4          | 55.4           | 14.2          |
| ri6   | 100.6                       | 3.3              | 105.5                     | 0.0            | 0.2            | 28.9          | 55.6           | 15.6          |
| waa1  | 44.7                        | 4.5              | 38.7                      | 0.6            | 9.4            | 15.9          | 15.3           | 59.0          |
| waa2  | 34.7                        | 4.9              | 54.0                      | 0.6            | 1.3            | 4.8           | 20.6           | 73.0          |
| waa3  | 32.3                        | 5.0              | 46.7                      | 1.9            | 1.4            | 5.0           | 18.1           | 73.9          |
| waa4  | 40.7                        | 4.6              | 64.6                      | 1.4            | 1.0            | 7.8           | 23.7           | 66.3          |
| waa5  | 39.1                        | 4.7              | 65.8                      | 0.0            | 0.1            | 7.2           | 24.8           | 68.3          |
| waa6  | 43.1                        | 4.5              | 78.2                      | 0.0            | 0.1            | 9.4           | 27.2           | 63.6          |
| pau1  | 23.4                        | 5.4              | 32.8                      | 0.1            | 1.1            | 4.0           | 12.7           | 82.3          |
| pau2  | 21.0                        | 5.6              | 32.2                      | 0.1            | 0.9            | 2.4           | 11.6           | 85.2          |
| pau3  | 28.4                        | 5.1              | 36.5                      | 4.2            | 1.6            | 3.5           | 13.4           | 77.7          |
| pau4  | 49.0                        | 4.4              | 59.3                      | 0.1            | 3.2            | 10.8          | 25.2           | 61.0          |
| pau5  | 46.7                        | 4.4              | 65.1                      | 0.2            | 0.7            | 6.1           | 28.9           | 64.5          |
| zui1  | 18.7                        | 5.7              | 26.7                      | 0.0            | 0.9            | 1.5           | 7.2            | 90.6          |
| zui2  | 24.7                        | 5.3              | 37.2                      | 0.0            | 0.8            | 2.7           | 13.4           | 83.5          |
| zui3  | 21.3                        | 5.6              | 28.7                      | 0.0            | 1.2            | 2.7           | 9.7            | 86.6          |
| zui4  | 27.1                        | 5.2              | 36.9                      | 0.2            | 1.1            | 2.1           | 13.6           | 83.3          |
| zui5  | 48.1                        | 4.4              | 67.5                      | 0.2            | 0.3            | 6.9           | 30.1           | 63.0          |
| sch1  | 205.9                       | 2.3              | 209.6                     | 0.0            | 28.0           | 63.1          | 4.7            | 4.2           |
| sch2  | 167.1                       | 2.6              | 171.8                     | 21.0           | 17.0           | 20.8          | 16.4           | 25.0          |
| sch3  | 132.7                       | 2.9              | 123.4                     | 15.1           | 16.4           | 20.3          | 19.9           | 28.4          |
| sch4  | 169.6                       | 2.6              | 137.1                     | 17.9           | 19.9           | 22.6          | 19.8           | 20.0          |
| sch5  | 193.6                       | 2.4              | 216.0                     | 0.4            | 29.4           | 46.7          | 10.0           | 13.6          |
| sch6  | 161.8                       | 2.6              | 212.9                     | 0.1            | 23.0           | 38.2          | 9.9            | 28.8          |
| sch7  | 205.6                       | 2.3              | 211.9                     | 0.0            | 26.8           | 62.5          | 2.8            | 7.9           |
| sch8  | 67.8                        | 3.9              | 74.7                      | 1.2            | 8.9            | 18.9          | 23.9           | 47.4          |
| sch9  | 148.8                       | 2.8              | 216.3                     | 2.6            | 22.3           | 31.7          | 16.9           | 26.8          |
| sch10 | 129.4                       | 3.0              | 224.8                     | 3.4            | 20.8           | 26.8          | 13.7           | 35.5          |
| sch11 | 209.2                       | 2.3              | 215.8                     | 0.0            | 30.0           | 59.2          | 3.3            | 7.6           |
| sch12 | 199.6                       | 2.3              | 198.4                     | 0.0            | 23.9           | 70.1          | 6.0            | 0.0           |
| rit1  | 308.4                       | 1.7              | 307.9                     | 10.2           | 60.0           | 29.6          | 0.2            | 0.0           |
| rit2  | 374.6                       | 1.4              | 376.3                     | 22.2           | 63.7           | 14.1          | 0.0            | 0.0           |

|      |       |     |       |     |     |      |      |      |
|------|-------|-----|-------|-----|-----|------|------|------|
| Do1  | 25.2  | 5.3 | 33.4  | 0.4 | 2.3 | 4.4  | 12.8 | 80.4 |
| Do2  | 23.6  | 5.4 | 28.3  | 2.7 | 1.8 | 3.4  | 11.1 | 81.2 |
| Do3  | 18.0  | 5.8 | 24.1  | 0.5 | 0.9 | 1.5  | 6.6  | 90.7 |
| Do4  | 23.1  | 5.4 | 29.1  | 1.0 | 2.3 | 3.8  | 10.6 | 82.5 |
| Do5  | 20.5  | 5.6 | 29.6  | 0.8 | 1.4 | 2.3  | 10.1 | 85.5 |
| Uit1 | 25.8  | 5.3 | 32.5  | 0.4 | 1.6 | 3.6  | 12.6 | 82.0 |
| Uit2 | 28.4  | 5.1 | 44.2  | 1.1 | 1.1 | 3.6  | 16.9 | 77.6 |
| Uit3 | 38.5  | 4.7 | 55.8  | 0.8 | 1.6 | 5.0  | 22.4 | 70.5 |
| Uit4 | 31.0  | 5.0 | 37.1  | 1.7 | 1.2 | 7.0  | 18.0 | 72.3 |
| Uit5 | 23.5  | 5.4 | 28.6  | 0.1 | 0.4 | 1.6  | 10.0 | 88.2 |
| Ho1  | 28.8  | 5.1 | 39.1  | 0.9 | 1.8 | 3.7  | 15.0 | 78.9 |
| Ho2  | 23.6  | 5.4 | 30.9  | 1.5 | 1.5 | 3.0  | 11.3 | 82.9 |
| Ho3  | 24.7  | 5.3 | 33.1  | 0.5 | 1.2 | 2.5  | 11.9 | 84.3 |
| Ho4  | 23.0  | 5.4 | 30.3  | 0.0 | 0.2 | 0.7  | 9.4  | 89.8 |
| Ho5  | 24.4  | 5.4 | 31.5  | 0.1 | 0.5 | 1.4  | 10.9 | 87.3 |
| Zwa1 | 32.2  | 5.0 | 42.2  | 0.2 | 1.6 | 3.5  | 17.0 | 78.1 |
| Zwa2 | 30.7  | 5.0 | 39.1  | 2.0 | 2.0 | 4.0  | 15.6 | 76.7 |
| Zwa3 | 27.8  | 5.2 | 36.1  | 0.2 | 1.3 | 2.3  | 12.9 | 83.6 |
| Zwa4 | 34.7  | 4.9 | 39.8  | 3.4 | 4.2 | 5.1  | 16.1 | 71.4 |
| Zwa5 | 24.8  | 5.3 | 32.3  | 0.1 | 0.8 | 1.5  | 10.7 | 87.1 |
| gri3 | 58.0  | 4.1 | 70.9  | 5.0 | 6.3 | 12.6 | 23.4 | 53.0 |
| gri2 | 36.3  | 4.8 | 47.1  | 1.1 | 3.7 | 7.7  | 18.3 | 69.5 |
| gri1 | 62.5  | 4.0 | 78.4  | 5.1 | 7.9 | 15.9 | 21.1 | 50.2 |
| gri4 | 123.0 | 3.0 | 129.0 | 0.0 | 3.2 | 45.3 | 41.3 | 10.3 |

**Fig. S1.** Images from the method used to collect the rectangular soil samples for the erosion experiment.

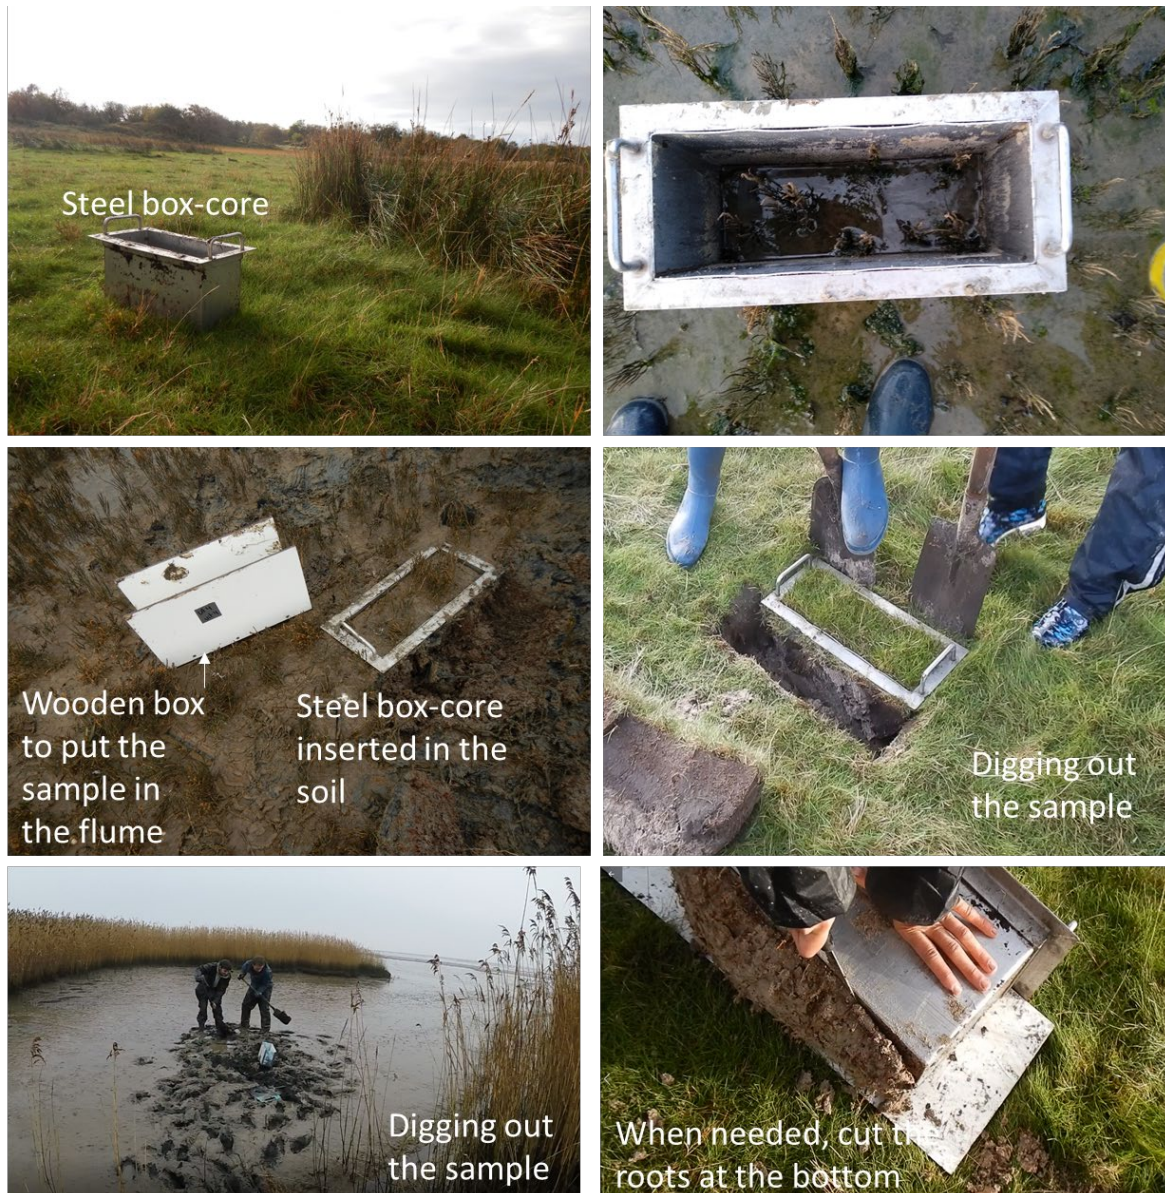

**Fig. S2.** a) Custom-made wooden boxes which fit in the flow flume with the soil samples inside, b) top view of a sample outside the flume. From each sample, 8 cm were cut off prior to the erosion test to analyse the vegetation belowground biomass and c) example of a sample inside the flume. An extra “wall” was installed in each side of the flume walls and on top of the sample edges to hold the samples and shield the small gap between the sample and the wooden box in order to prevent soil scouring in the margins of the sample. The extra walls were removed after each erosion test and installed again for every sample.

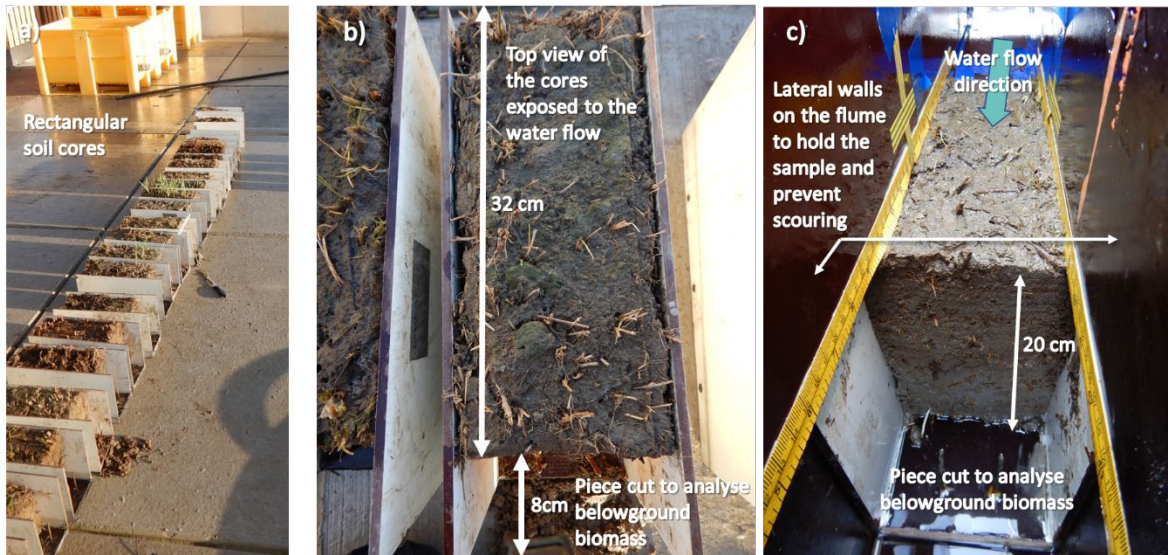



**Fig. S3.** Mean erosion depth over time from a subset of samples to test their stability during a prolonged period of time (16h) exposed to fast water flow. All these samples had an artificial crack made after 3h of flow exposure.

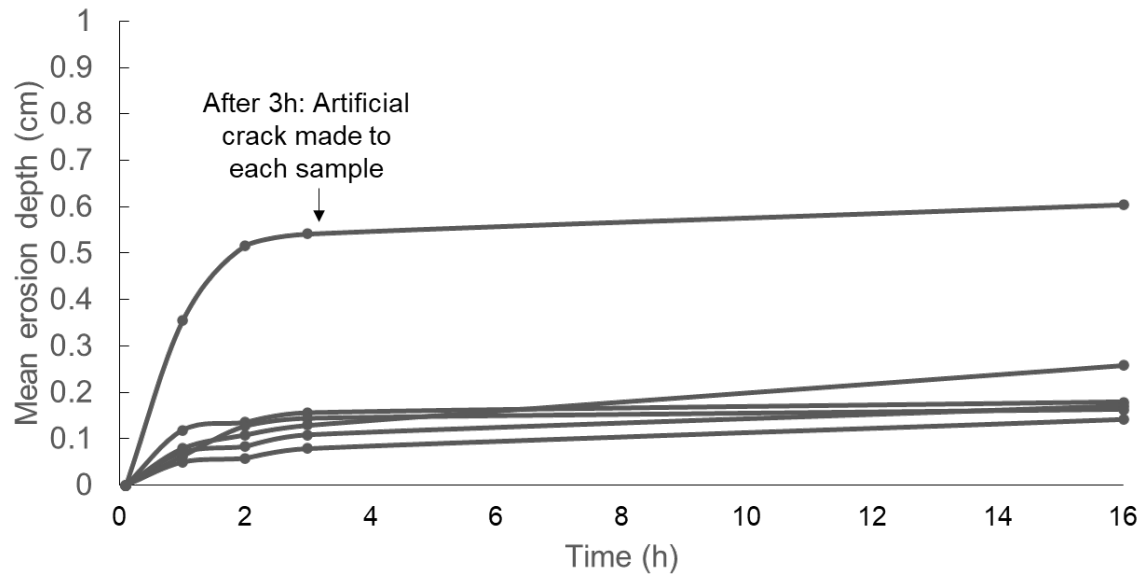

**Fig. S4.** Erosion data including all the samples, were it can be observed the binary response (completely eroded or not eroded). a) shows a boxplot of the mean top erosion, measured as erosion depth (cm), at the end of the experiment after 3 hours of flow exposure, separated by habitat types. The cores were 20 cm depth, therefore, erosion of 20 cm indicates complete erosion; b) shows the erosion depth (cm) in relation to the environmental variables measured.

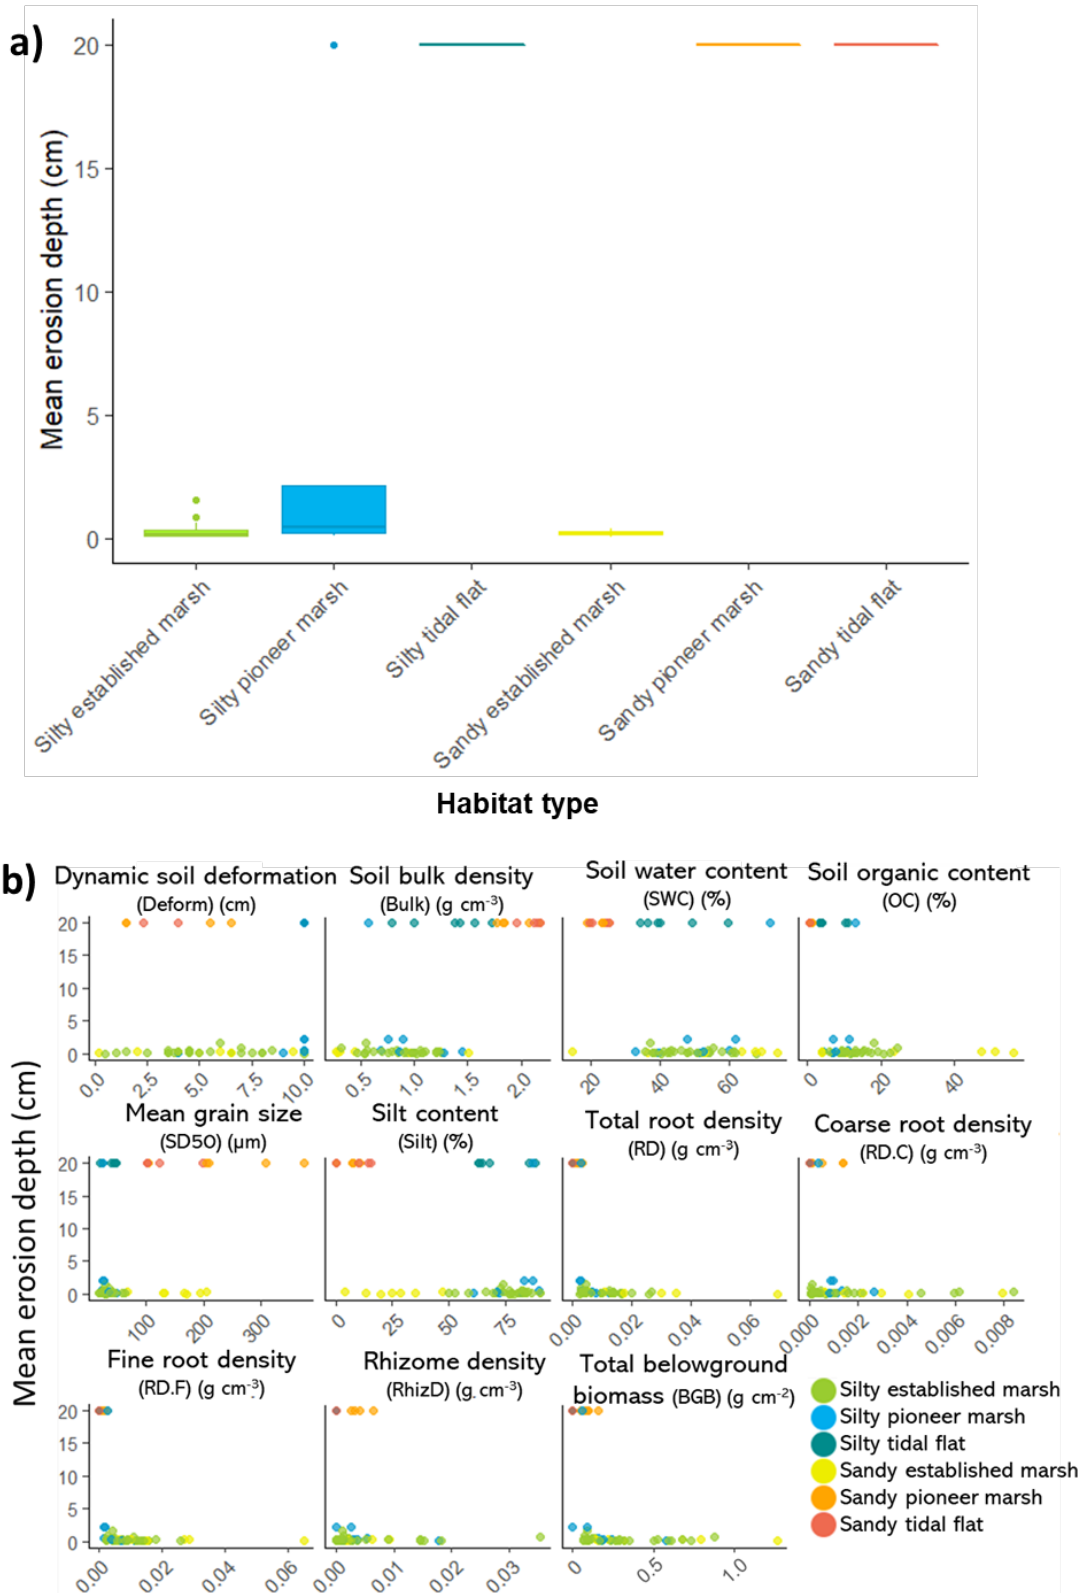

**Fig. S5.** Spearman correlation matrix showing the relationships among the environmental variables. Comp = dynamic soil deformation (cm), BulkD = Bulk density ( $\text{g cm}^{-3}$ ), SWC = Soil water content (%), OC = Soil organic content (%), SD50 = mean grain size ( $\mu\text{m}$ ), Silt = silt %, RD = total root density ( $\text{g cm}^{-3}$ ), RhizD = Rhizome density ( $\text{g cm}^{-3}$ ), RD.C = coarse root density ( $\text{g cm}^{-3}$ ), RD.F = fine root density ( $\text{g cm}^{-3}$ ), BGB = belowground biomass (roots + rhizomes) (g).

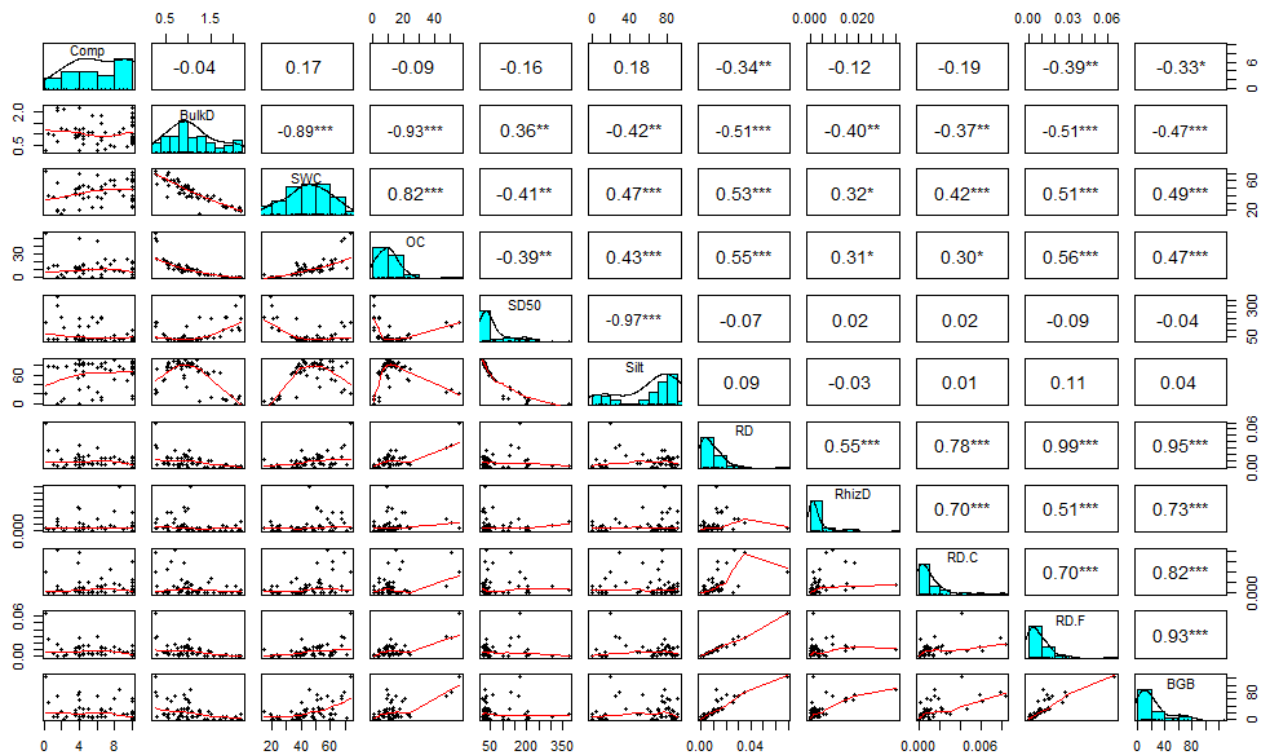

**Fig. S6.** Front view from a sandy tidal flat sample before and after 3 minutes of flow exposure, where it completely eroded; and from a sandy marsh with cohesive top layer, which did not erode after 3 hours of flow exposure.

**Sandy tidal flat before erosion test**

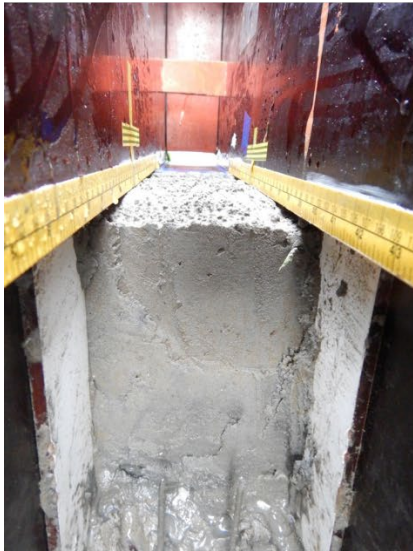

**Sandy tidal flat, completely eroded after 3 min of flow exposure**

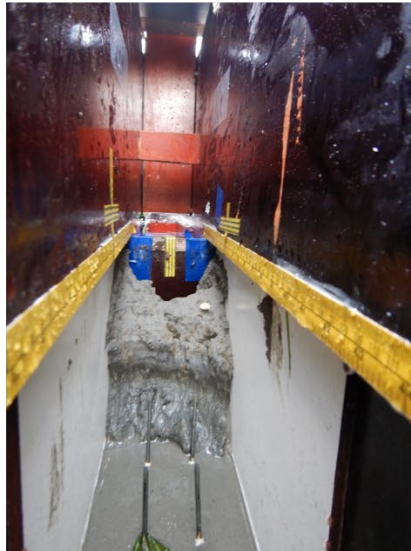

**Sandy marsh with cohesive top layer and sandy bottom, not eroded after 3h of flow exposure**

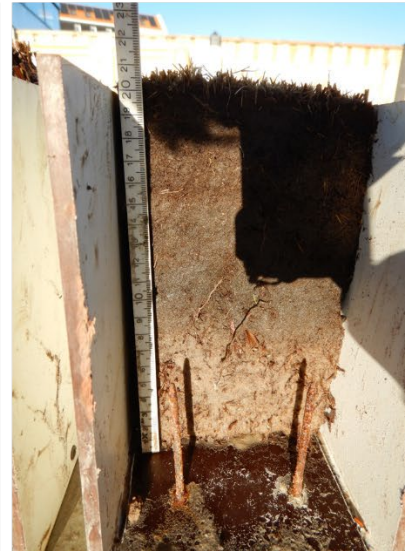

**Fig. S7.** Example of the erosion profiles measured with the erosion pins in a stable marsh sample and a bare tidal flat sample (not stable), for the two profiles done per sample.

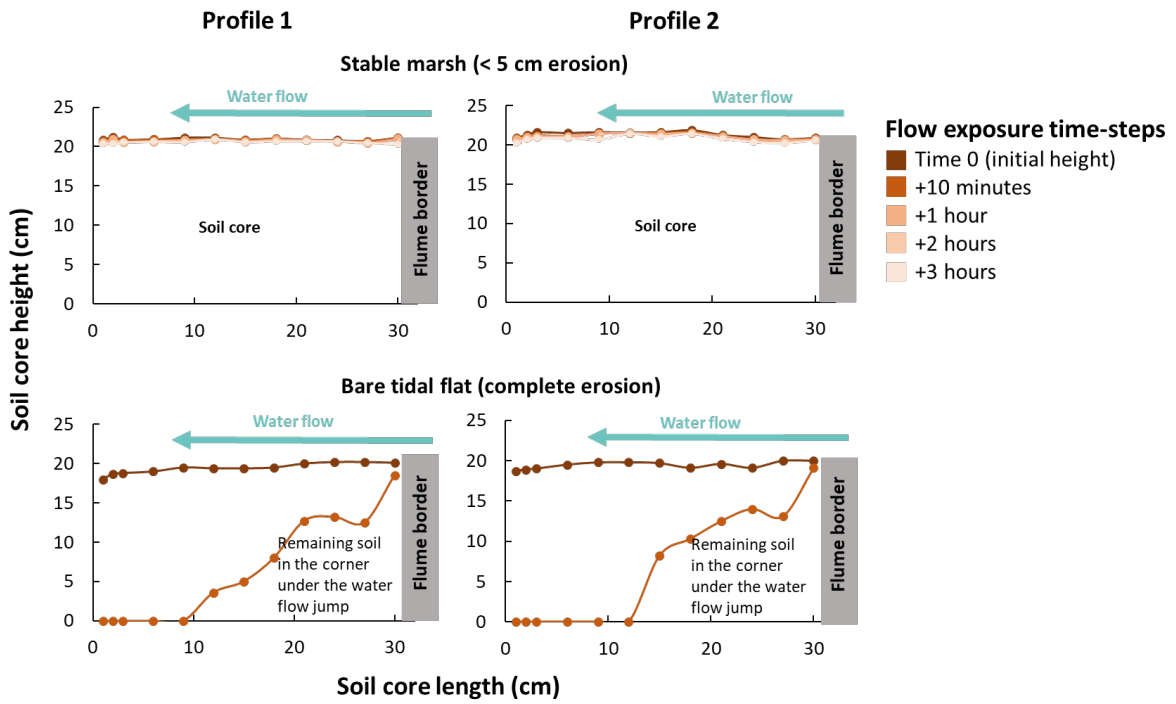

**Fig. S8.** Example of the erosion in form of blocks in samples with natural cracks due to a summer drought (top view of the sample).

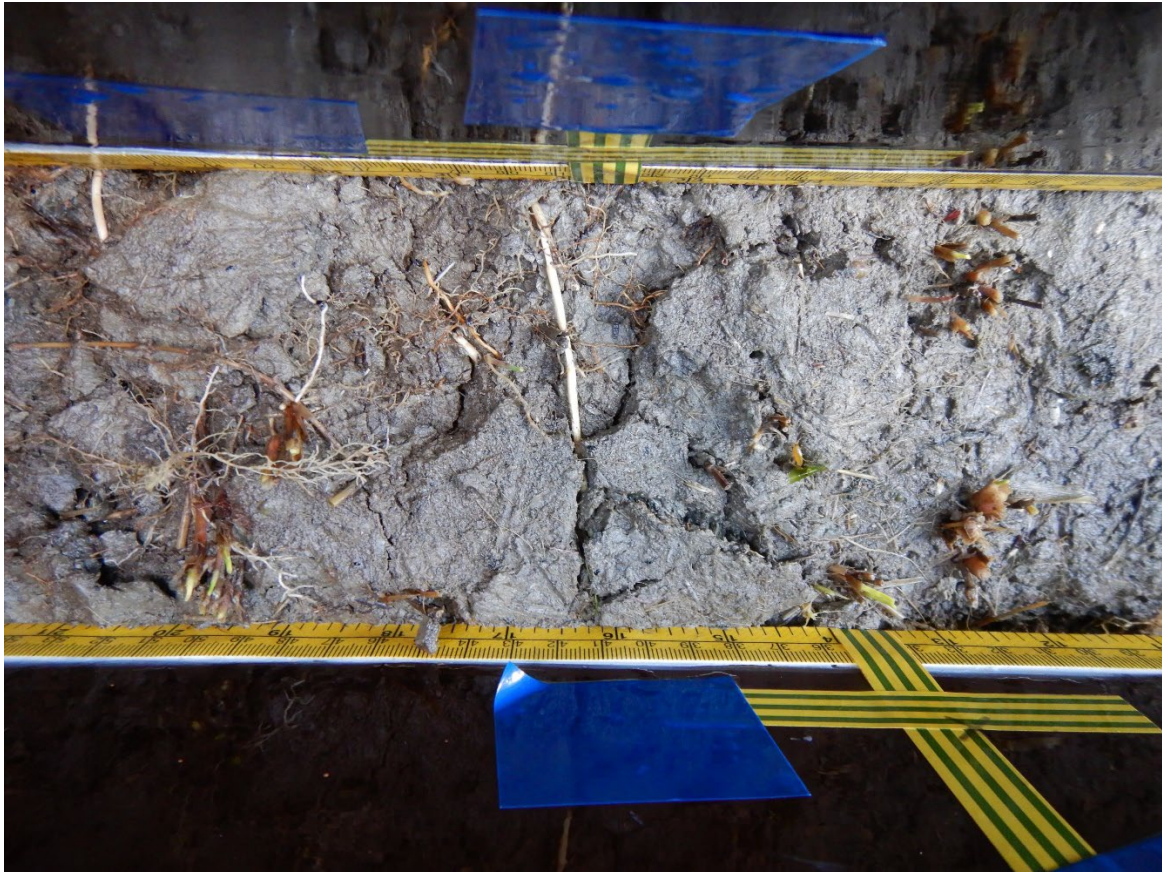

**Fig. S9.** a) Overview of the deep soil profiles up to 1.5 m depth found in the different habitat types from all the locations studied. Each bar corresponds to one sampling location. Silty and sand + peat top layers in the profiles are the ones considered cohesive top layers. It can be observed that it is common to find an alternation between silty and sandy layers. b) Deep profiles separated by habitat and location (Schi=Schiermonnikoog, ri=Rilland, rit = Ritthem, Gri=Griend, do=Dollard Bay, ho = Holwerd, Pau= Paulina, Uit= Uithuizen, Waa = Waarde, Zui= Zuidgors. Zwa = Zwarte Haan). More details from each location can be found in Table S1.

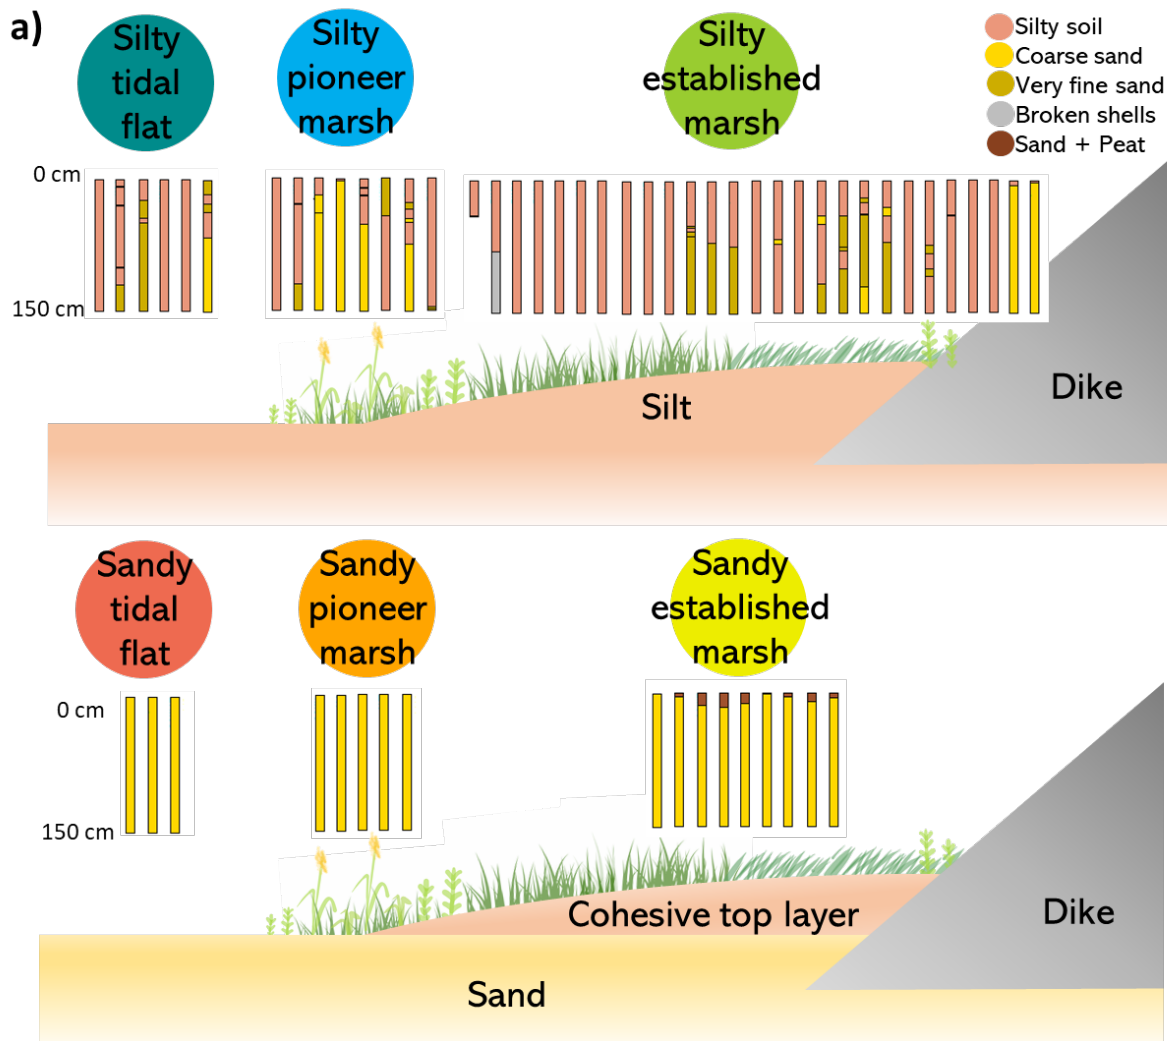

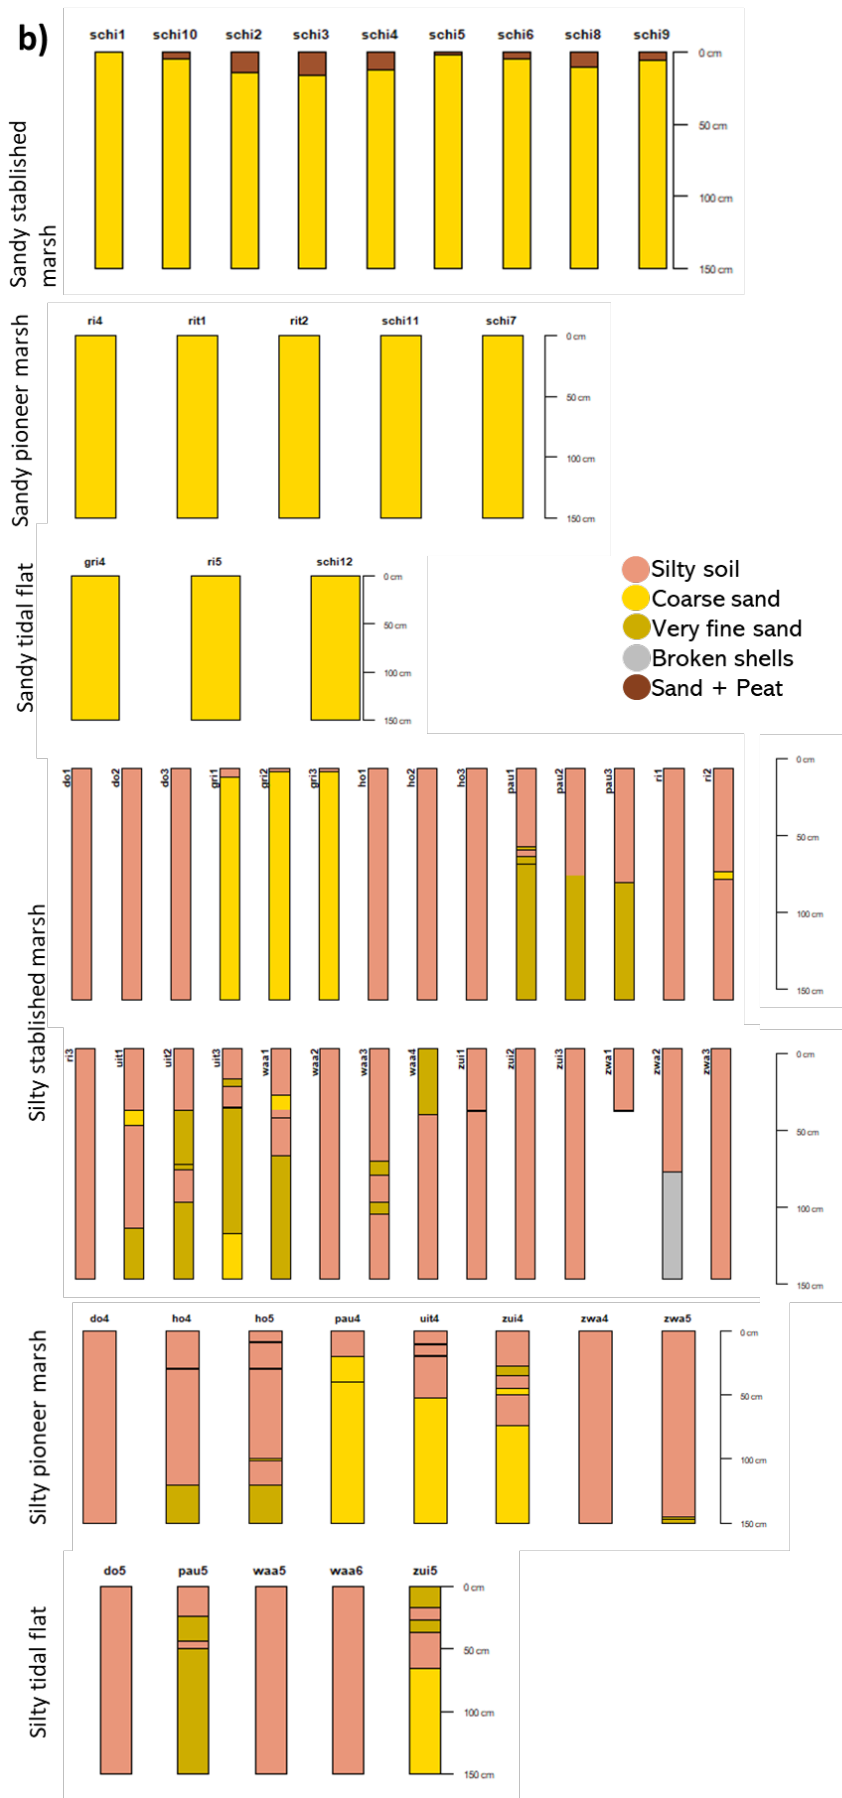

Supplement: EAP-32-e2622-s001.pdf [file EAP-32-e2622-s001.pdf]
